# Supplementary material for: Rapid Limit Test of Eight Quinolone Residues in Food Based on TLC-SERS, a New Limit Test Method
Source: MDPI journal article supplement (doi:10.3390/molecules28186473), 2023-09-06
Supplement: s1 [file s1]

# Rapid Limit Test of Eight Quinolone Residues in Food Based on New Limit Test Method: TLC-SERS

## Supplementary Materials

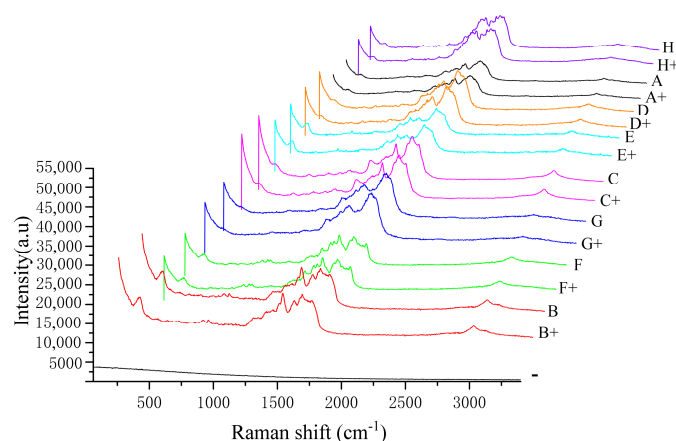

**Figure S1.** The SERS of the eight quinolones in the simulated positive sample by the TLC-SERS. (H, A, D, E, C, G, F, and B represent Nadifloxacin, Enrofloxacin, Fleroxacin, Sparfloxacin, Ofloxacin, Gatifloxacin, Enoxacin, and Ciprofloxacin, respectively. H<sup>+</sup>, A<sup>+</sup>, E<sup>+</sup>, D<sup>+</sup>, C<sup>+</sup>, G<sup>+</sup>, F<sup>+</sup>, B<sup>+</sup> represents Simulated positive samples containing H, A, D, E, C, G, F, and B; “-” represents Negative sample.)

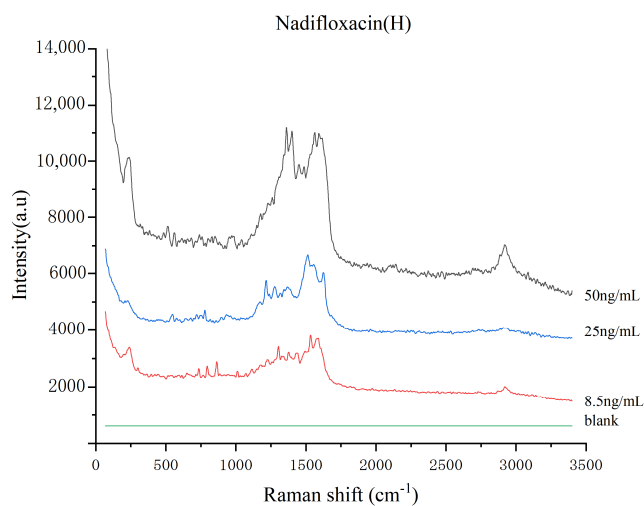

**Figure S2.** The SERS of the nadifloxacin (H) of different concentrations by the TLC-SERS.

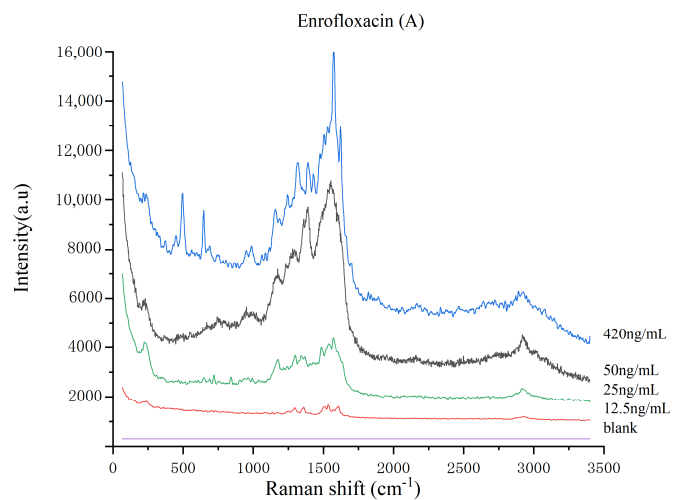

**Figure S3.** The SERS of the enrofloxacin (A) of different concentrations by the TLC-SERS.

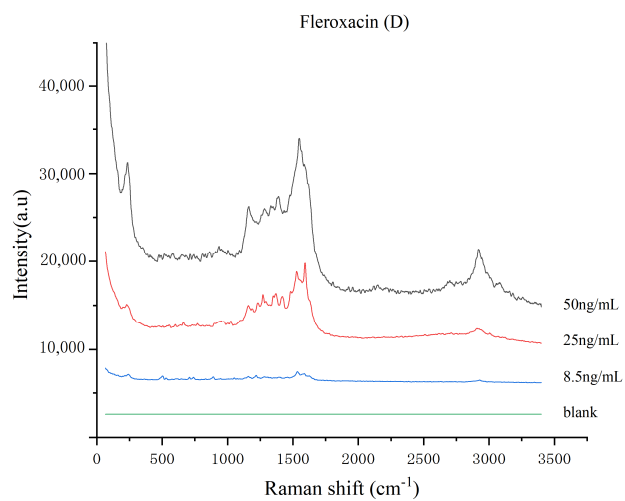

**Figure S4.** The SERS of the fleroxacin (D) of different concentrations by the TLC-SERS.

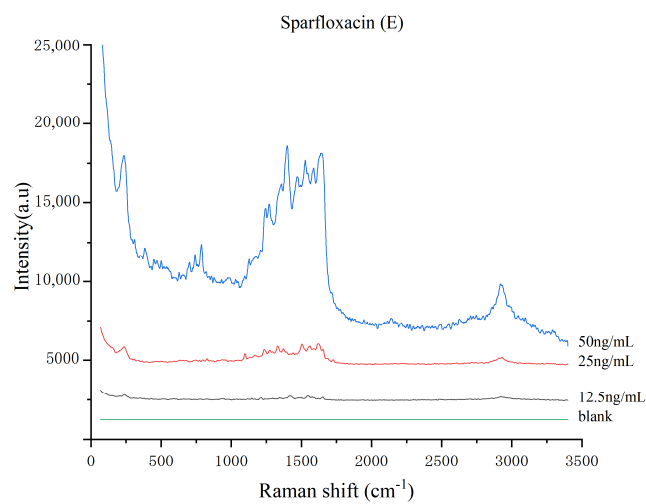

**Figure S5.** The SERS of the sparfloxacin (E) of different concentrations by the TLC-SERS.

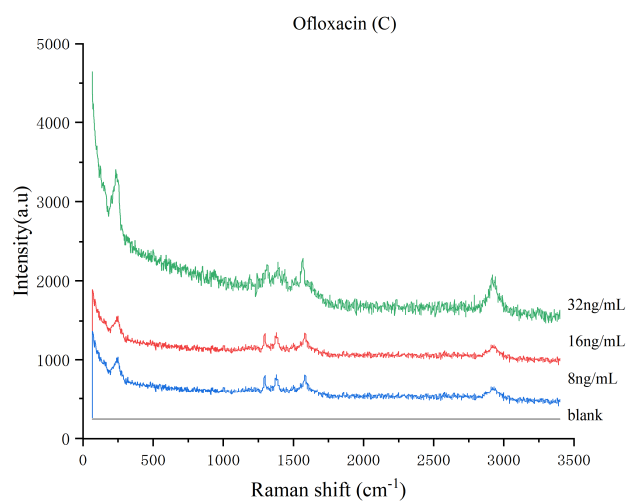

**Figure S6.** The SERS of the ofloxacin (C) of different concentrations by the TLC-SERS.

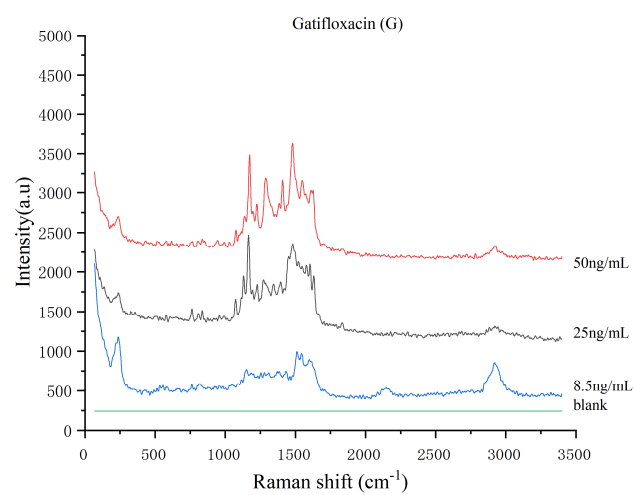

**Figure S7.** The SERS of the gatifloxacin (G) of different concentrations by the TLC-SERS.

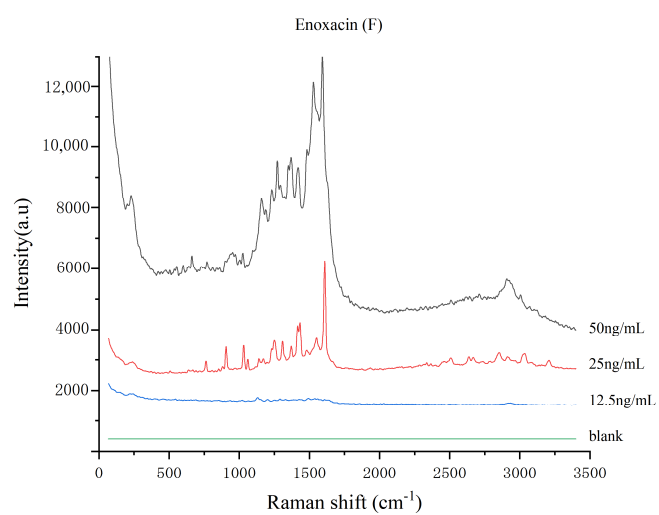

**Figure S8.** The SERS of the enoxacin (F) of different concentrations by the TLC-SERS.

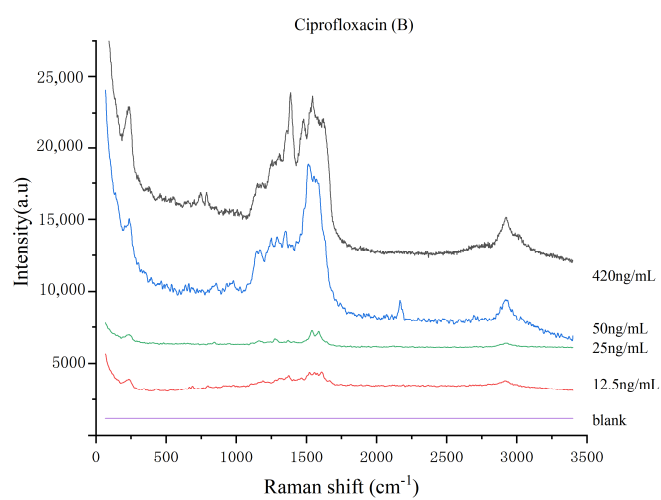

**Figure S9.** The SERS of the ciprofloxacin (B) of different concentrations by the TLC-SERS.

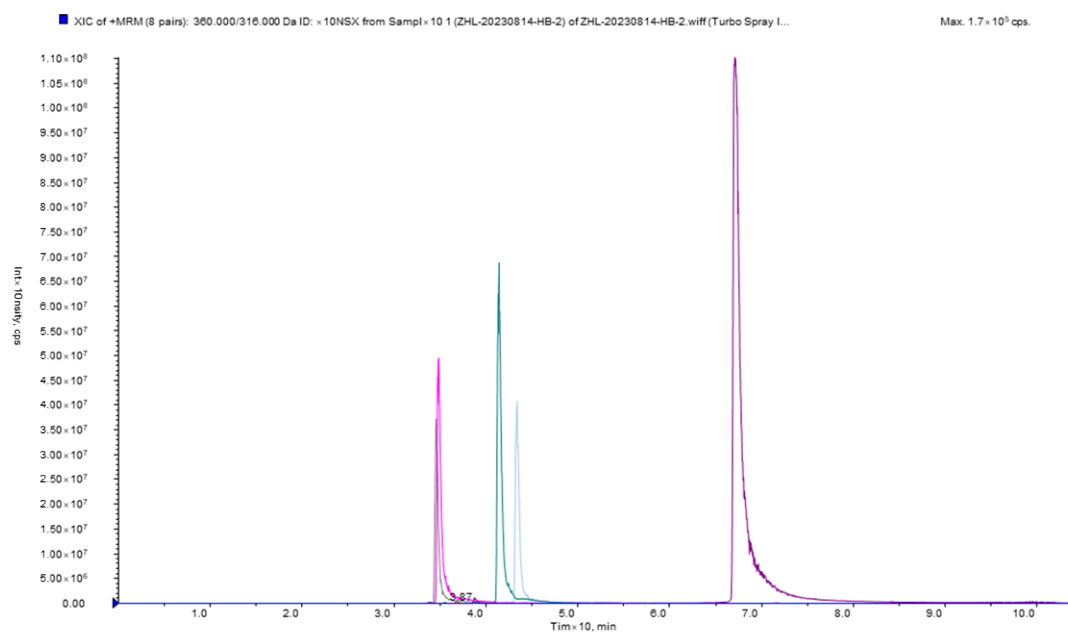

**Figure S10.** The ion flow chromatograms of eight quinolones.

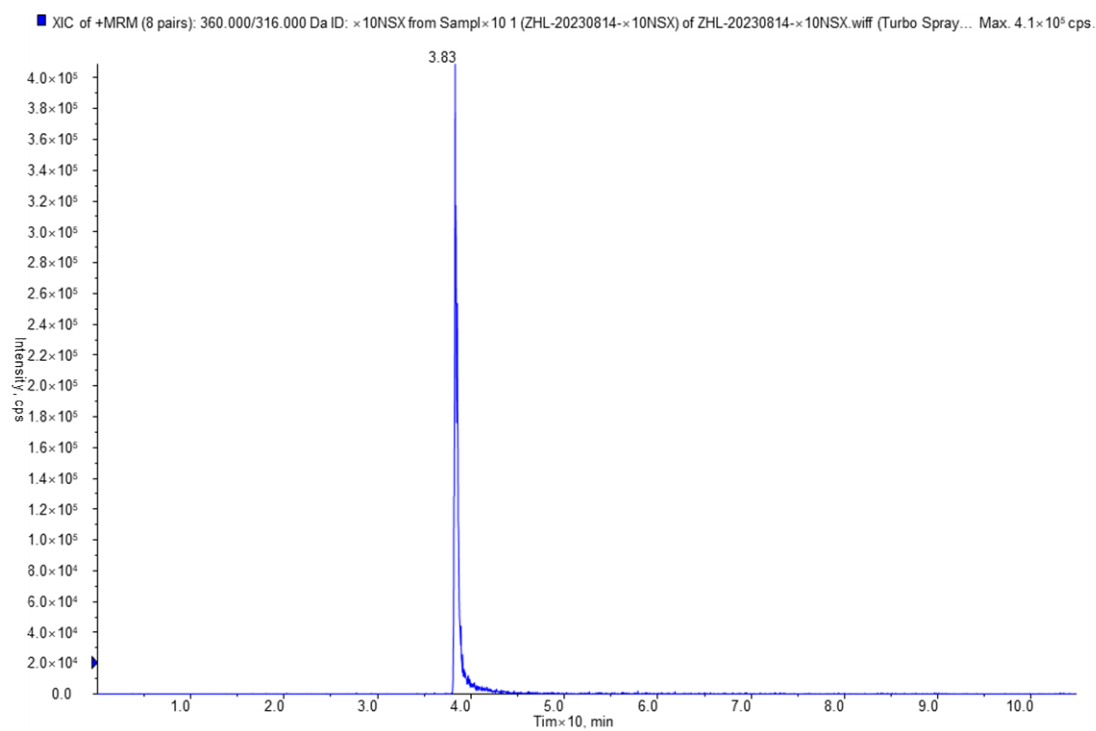

**Figure S11.** The chromatograms of sample 3 by UPLC-MS/MS.

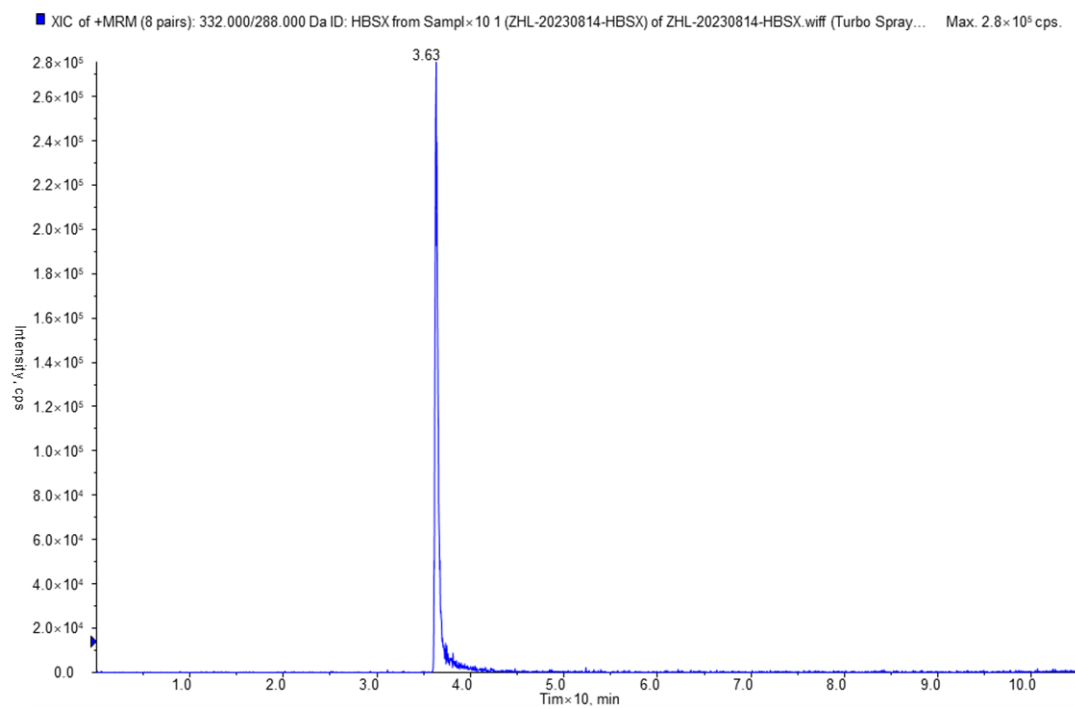

**Figure S12.** The chromatograms of sample 8 by UPLC-MS/MS.

**Table S1.** Comparison between the TLC-SERS and the UPLC-MS/MS to determine of the eight quinolones residues in aquatic products.

|   | UPLC-MS/MS                  |                         |                        | TLC-SERS                    |                         |                        |
|---|-----------------------------|-------------------------|------------------------|-----------------------------|-------------------------|------------------------|
|   | LOD <sub>1</sub><br>(μg/kg) | RSD <sub>1</sub><br>(%) | Time required<br>(min) | LOD <sub>2</sub><br>(μg/kg) | RSD <sub>2</sub><br>(%) | Time required<br>(min) |
| H | 1.0                         | ≤13.1                   | ≅ 250                  | 2.2                         | 2.9~4.3                 | ≅ 15                   |
| A | 1.0                         | ≤15.0                   | ≅ 250                  | 3.2                         | 2.2~3.8                 | ≅ 15                   |
| D | 6.7                         | ≤10.4                   | ≅ 250                  | 2.2                         | 2.9~4.1                 | ≅ 15                   |
| E | 1.0                         | ≤15.0                   | ≅ 250                  | 4.8                         | 2.9~3.7                 | ≅ 15                   |
| C | 1.0                         | ≤15.0                   | ≅ 250                  | 2.0                         | 3.1~4.9                 | ≅ 15                   |
| G | 1.0                         | ≤15.0                   | ≅ 250                  | 2.2                         | 3.0~4.5                 | ≅ 15                   |
| F | 1.0                         | ≤15.0                   | ≅ 250                  | 4.8                         | 3.1~4.6                 | ≅ 15                   |
| B | 1.0                         | ≤15.0                   | ≅ 250                  | 3.2                         | 2.1~3.9                 | ≅ 15                   |

Under the UPLC-MS/MS, LOD<sub>1</sub> and RSD<sub>1</sub> are respectively the limit of detection and relative standard deviation Required by the National Standard of the People's Republic of China Announcement No. 1077-1-2008 of the Ministry of Agriculture. Under the TLC-SERS , LOD<sub>2</sub> is the actual limit of detection of the quinolones in the TLC-SERS; RSD<sub>2</sub> is the relative standard deviation of the S/N values at the characteristic peaks ( $v_{C-N}$ ) from the quinolones reference materials of different concentrations. H, A, D, E, C, G, F, and B represent Nadifloxacin, Enrofloxacin, Fleroxacin, Sparfloxacin, Ofloxacin, Gatifloxacin, Enoxacin, and Ciprofloxacin, respectively.

**Table S2.** The EF at Raman spectra characteristic peaks of the eight quinolones.

|   | Functional group                    | Raman Shift (cm <sup>-1</sup> ) | SERS              |                           |                                      |                                 | Raman              |                            |                                        | EF                  |
|---|-------------------------------------|---------------------------------|-------------------|---------------------------|--------------------------------------|---------------------------------|--------------------|----------------------------|----------------------------------------|---------------------|
|   |                                     |                                 | I <sub>SERS</sub> | M <sub>SERS</sub><br>(μg) | I <sub>SERS</sub> /M <sub>SERS</sub> | Raman Shift (cm <sup>-1</sup> ) | I <sub>blank</sub> | M <sub>blank</sub><br>(μg) | I <sub>blank</sub> /M <sub>blank</sub> |                     |
| H | VC=C                                | 1587                            | 12896             | 2.0×10 <sup>-4</sup>      | 6.4×10 <sup>7</sup>                  | 1620                            | 562                | 10                         | 56.2                                   | 1.1×10 <sup>6</sup> |
|   | VC=C                                | 1398                            | 12576             | 2.0×10 <sup>-4</sup>      | 6.3×10 <sup>7</sup>                  | 1398                            | 714                | 10                         | 71.4                                   | 8.8×10 <sup>5</sup> |
|   | β <sub>CH2</sub> , β <sub>CH3</sub> | 1257                            | 8107              | 2.0×10 <sup>-4</sup>      | 4.1×10 <sup>7</sup>                  | 1261                            | 155                | 10                         | 15.5                                   | 2.6×10 <sup>6</sup> |
|   | VC-N                                | 1157                            | 5509              | 2.0×10 <sup>-4</sup>      | 2.8×10 <sup>7</sup>                  | 1136                            | 196                | 10                         | 19.6                                   | 1.4×10 <sup>6</sup> |
| A | VC=C                                | 1552                            | 8131              | 4.0×10 <sup>-3</sup>      | 2.0×10 <sup>6</sup>                  | 1628                            | 655                | 10                         | 65.5                                   | 3.1×10 <sup>4</sup> |
|   | VC=C                                | 1389                            | 7046              | 4.0×10 <sup>-3</sup>      | 1.8×10 <sup>6</sup>                  | 1389                            | 1577               | 10                         | 157.7                                  | 1.1×10 <sup>4</sup> |
|   | β <sub>CH2</sub> , β <sub>CH3</sub> | 1281                            | 5385              | 4.0×10 <sup>-3</sup>      | 1.3×10 <sup>6</sup>                  | 1284                            | 100                | 10                         | 10.0                                   | 1.3×10 <sup>5</sup> |
|   | VC-N                                | 1173                            | 4539              | 4.0×10 <sup>-3</sup>      | 1.1×10 <sup>6</sup>                  | 1178                            | 56                 | 10                         | 5.6                                    | 2.0×10 <sup>5</sup> |
| D | VC=C                                | 1535                            | 14354             | 2.0×10 <sup>-4</sup>      | 7.2×10 <sup>7</sup>                  | 1531                            | 579                | 10                         | 57.9                                   | 1.2×10 <sup>6</sup> |
|   | VC=C                                | 1379                            | 10803             | 2.0×10 <sup>-4</sup>      | 5.4×10 <sup>7</sup>                  | 1381                            | 1994               | 10                         | 199.4                                  | 2.7×10 <sup>5</sup> |
|   | β <sub>CH2</sub> , β <sub>CH3</sub> | 1298                            | 8285              | 2.0×10 <sup>-4</sup>      | 4.1×10 <sup>7</sup>                  | 1296                            | 328                | 10                         | 32.8                                   | 1.2×10 <sup>6</sup> |
|   | VC-N                                | 1255                            | 6650              | 2.0×10 <sup>-4</sup>      | 3.3×10 <sup>7</sup>                  | 1227                            | 520                | 10                         | 52.0                                   | 6.3×10 <sup>5</sup> |
| E | VC=C                                | 1549                            | 10418             | 2.0×10 <sup>-4</sup>      | 5.2×10 <sup>7</sup>                  | 1533                            | 758                | 10                         | 75.8                                   | 6.9×10 <sup>5</sup> |
|   | VC=C                                | 1373                            | 7036              | 2.0×10 <sup>-4</sup>      | 3.5×10 <sup>7</sup>                  | 1388                            | 1977               | 10                         | 197.7                                  | 1.8×10 <sup>5</sup> |
|   | β <sub>CH2</sub> , β <sub>CH3</sub> | 1279                            | 7215              | 2.0×10 <sup>-4</sup>      | 3.6×10 <sup>7</sup>                  | 1286                            | 3369               | 10                         | 336.9                                  | 1.1×10 <sup>5</sup> |
|   | VC-N                                | 1176                            | 5145              | 2.0×10 <sup>-4</sup>      | 2.6×10 <sup>7</sup>                  | 1176                            | 543                | 10                         | 54.3                                   | 4.8×10 <sup>5</sup> |
| C | VC=C                                | 1552                            | 14493             | 8.0×10 <sup>-5</sup>      | 1.8×10 <sup>8</sup>                  | 1554                            | 460                | 10                         | 46.0                                   | 4.0×10 <sup>6</sup> |
|   | VC=C                                | 1394                            | 12124             | 8.0×10 <sup>-5</sup>      | 1.5×10 <sup>8</sup>                  | 1400                            | 1488               | 10                         | 148.8                                  | 1.0×10 <sup>6</sup> |
|   | β <sub>CH2</sub> , β <sub>CH3</sub> | 1300                            | 8055              | 8.0×10 <sup>-5</sup>      | 1.0×10 <sup>8</sup>                  | 1300                            | 170                | 10                         | 17.0                                   | 5.9×10 <sup>6</sup> |
|   | VC-N                                | 1151                            | 6982              | 8.0×10 <sup>-5</sup>      | 8.7×10 <sup>7</sup>                  | 1149                            | 287                | 10                         | 28.7                                   | 3.0×10 <sup>6</sup> |
| G | VC=C                                | 1562                            | 14826             | 2.0×10 <sup>-4</sup>      | 7.4×10 <sup>7</sup>                  | 1556                            | 272                | 10                         | 27.2                                   | 2.7×10 <sup>6</sup> |
|   | VC=C                                | 1357                            | 11110             | 2.0×10 <sup>-4</sup>      | 5.6×10 <sup>7</sup>                  | 1371                            | 232                | 10                         | 23.2                                   | 2.4×10 <sup>6</sup> |
|   | β <sub>CH2</sub> , β <sub>CH3</sub> | 1286                            | 9437              | 2.0×10 <sup>-4</sup>      | 4.7×10 <sup>7</sup>                  | 1280                            | 154                | 10                         | 15.4                                   | 3.1×10 <sup>6</sup> |
|   | VC-N                                | 1151                            | 7176              | 2.0×10 <sup>-4</sup>      | 3.6×10 <sup>7</sup>                  | 1155                            | 140                | 10                         | 14.0                                   | 2.6×10 <sup>6</sup> |
| F | VC=C                                | 1540                            | 8635              | 2.0×10 <sup>-4</sup>      | 4.3×10 <sup>7</sup>                  | 1547                            | 376                | 10                         | 37.6                                   | 1.1×10 <sup>6</sup> |
|   | VC=C                                | 1414                            | 9081              | 2.0×10 <sup>-4</sup>      | 4.5×10 <sup>7</sup>                  | 1404                            | 4325               | 10                         | 432.5                                  | 1.0×10 <sup>5</sup> |
|   | β <sub>CH2</sub> , β <sub>CH3</sub> | 1265                            | 5423              | 2.0×10 <sup>-4</sup>      | 2.7×10 <sup>7</sup>                  | 1290                            | 679                | 10                         | 67.9                                   | 4.0×10 <sup>5</sup> |
|   | VC-N                                | 1161                            | 2942              | 2.0×10 <sup>-4</sup>      | 1.5×10 <sup>7</sup>                  | 1153                            | 144                | 10                         | 14.4                                   | 1.0×10 <sup>6</sup> |
| B | VC=C                                | 1543                            | 11656             | 4.0×10 <sup>-3</sup>      | 2.9×10 <sup>6</sup>                  | 1570                            | 414                | 10                         | 41.4                                   | 7.0×10 <sup>4</sup> |
|   | VC=C                                | 1386                            | 11892             | 4.0×10 <sup>-3</sup>      | 3.0×10 <sup>6</sup>                  | 1387                            | 3036               | 10                         | 303.6                                  | 9.9×10 <sup>3</sup> |
|   | β <sub>CH2</sub> , β <sub>CH3</sub> | 1307                            | 7613              | 4.0×10 <sup>-3</sup>      | 1.9×10 <sup>6</sup>                  | 1313                            | 332                | 10                         | 33.2                                   | 5.7×10 <sup>4</sup> |
|   | VC-N                                | 1151                            | 5472              | 4.0×10 <sup>-3</sup>      | 1.4×10 <sup>6</sup>                  | 1162                            | 145                | 10                         | 14.5                                   | 9.6×10 <sup>4</sup> |

EF is the Raman enhancement factor, I<sub>SERS</sub> and I<sub>blank</sub> are the Raman intensities at characteristic peaks of the SERS active substrate and blank substrate; M<sub>SERS</sub> and M<sub>blank</sub> are the mass (μg) of the quinolones on the SERS active substrate and blank substrate. H, A, D, E, C, G, F, and B represent Nadifloxacin, Enrofloxacin, Fleroxacin, Sparfloxacin, Ofloxacin, Gatifloxacin, Enoxacin, and Ciprofloxacin, respectively.
